# Supplementary material for: Host–guest interactions in azafullerene (C59N)-single-wall carbon nanotube (SWCNT) peapod hybrid structures
Source: Royal Society of Chemistry journal article supplement (doi:10.1039/b917619e), 2010-01-01
Supplement: b917619e.pdf [file b917619e.pdf]

## Supporting information

### Host-Guest Interactions in Azafullerene (C<sub>59</sub>N)–Single-Wall Carbon Nanotubes (SWCNT) Peapod Hybrid Structures

Yoko Iizumi,<sup>a, b</sup> Toshiya Okazaki,<sup>\*, a, b, c</sup> Zhen Liu,<sup>b</sup> Kazu Suenaga,<sup>b</sup> Takeshi Nakanishi,<sup>b</sup> Sumio Iijima,<sup>b</sup> Georgios Rotas,<sup>d</sup> and Nikos Tagmatarchis<sup>d</sup>

*Department of Chemistry, University of Tsukuba, Tsukuba 305-8577, Japan, Nanotube Research Center, National Institute of Advanced Industrial Science and Technology (AIST), Tsukuba 305-8565, Japan, PRESTO, Japan Science and Technology Agency (JST), 4-1-8 Honcho, Kawaguchi 332-0012, Japan, Theoretical and Physical Chemistry Institute, National Hellenic Research Foundation, 48 Vassileos Constantinou Avenue, 11635 Athens, Greece*

Table S1. Observed optical transition energies of azafullerene NPDs in micelle solution.

|         | $(n, m)$ | $E_{11}$ (eV) | $E_{22}$ (eV) |
|---------|----------|---------------|---------------|
| Type I  | (13, 5)  | 0.842         | 1.255         |
|         | (12, 7)  | 0.783         | 1.308         |
|         | (11, 9)  | 0.750         | 1.300         |
|         | (16, 2)  | 0.775         | 1.246         |
|         | (15, 4)  | 0.752         | 1.248         |
|         | (14, 6)  | 0.735         | 1.249         |
|         | (13, 8)  | 0.714         | 1.232         |
|         | (12, 10) | 0.691         | 1.196         |
| Type II | (13, 6)  | 0.742         | 1.391         |
|         | (12, 8)  | 0.740         | 1.330         |
|         | (11, 10) | 0.717         | 1.269         |
|         | (16, 3)  | 0.716         | 1.347         |
|         | (15, 5)  | 0.715         | 1.312         |
|         | (14, 7)  | 0.699         | 1.271         |
|         | (13, 9)  | 0.682         | 1.224         |

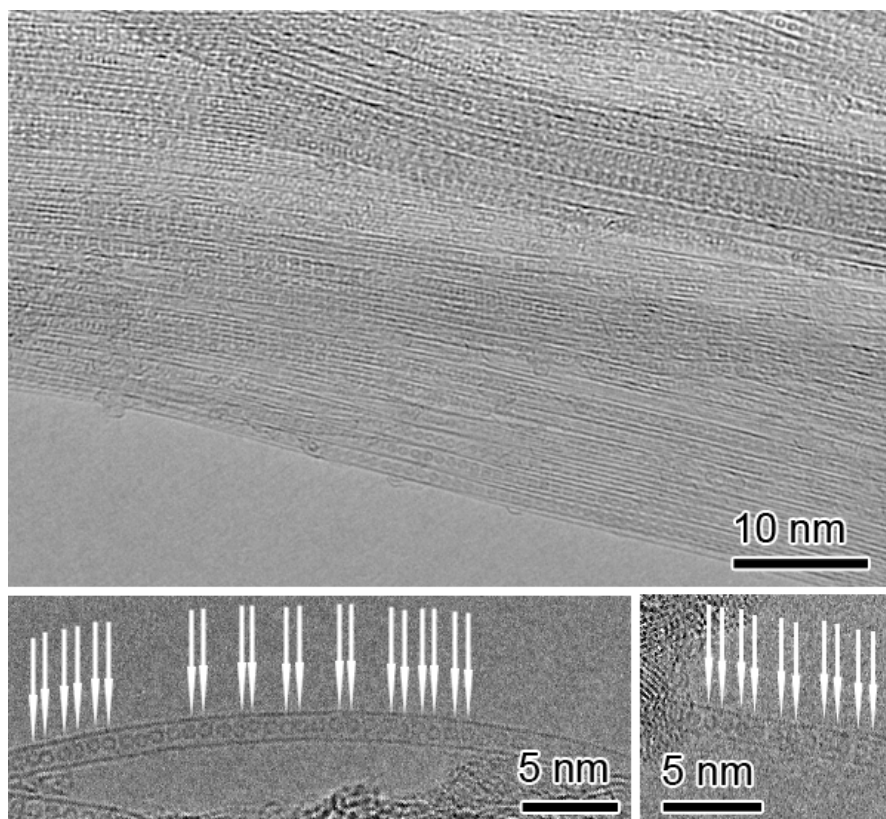

**Figure S1.** HR-TEM images of azafullerene NPDs. Azafullerene NPDs were produced in a high-yield. Arrows show the azafullerene dimer in SWCNTs, while some monomer and oligomer are also present. Azafullerenes were encapsulated in purified SWCNTs produced by the arc-discharging method (Meijo Arc APJ-type, Meijo Nano Carbon, Ltd.).

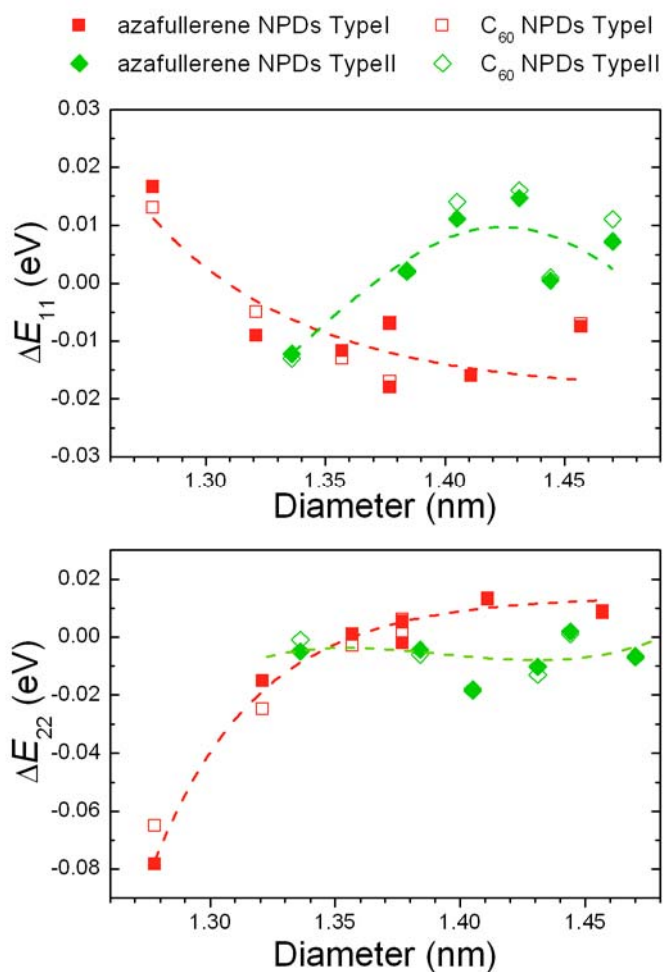

**Figure S2.** Differences in optical transition energy in  $E_{11}$  and  $E_{22}$  between azafullerene peapods and SWCNTs ( $\Delta E_{ii} = E_{ii}^{\text{NPDs}} - E_{ii}^{\text{SWCNTs}}$ ,  $i = 1, 2$ ) as a function of tube diameter, together with reference results of those of C<sub>60</sub> NPDs.<sup>10,11</sup>
